# Supplementary material for: Zorrimidazolone, a Bioactive Alkaloid from the Non-Indigenous Mediterranean Stolidobranch Polyandrocarpa zorritensis
Source: MDPI journal article supplement (doi:10.3390/md9061157), 2011-06-23

## Supporting Information

|                                                                                    |     |
|------------------------------------------------------------------------------------|-----|
| <sup>1</sup> H-NMR spectrum of compound <b>1</b> in CDCl <sub>3</sub>              | S2  |
| COSY spectrum of compound <b>1</b> in CDCl <sub>3</sub>                            | S3  |
| HSQC spectrum of compound <b>1</b> in CDCl <sub>3</sub>                            | S4  |
| HMBC spectrum of compound <b>1</b> in CDCl <sub>3</sub>                            | S5  |
| <sup>13</sup> C-NMR spectrum of compound <b>1</b> in CDCl <sub>3</sub>             | S6  |
| <sup>1</sup> H-NMR spectrum of compound <b>1</b> in DMSO                           | S7  |
| COSY spectrum of compound <b>1</b> in DMSO                                         | S8  |
| HSQC spectrum of compound <b>1</b> in DMSO                                         | S9  |
| HMBC spectrum of compound <b>1</b> in DMSO                                         | S10 |
| ROESY spectrum compound <b>1</b> in DMSO                                           | S11 |
| <sup>1</sup> H-NMR spectrum of zorrimidazolone ( <b>2</b> ) in CD <sub>3</sub> OD  | S12 |
| <sup>13</sup> C-NMR spectrum of zorrimidazolone ( <b>2</b> ) in CD <sub>3</sub> OD | S13 |
| HSQC spectrum of zorrimidazolone ( <b>2</b> ) in CD <sub>3</sub> OD                | S14 |
| HMBC spectrum of zorrimidazolone ( <b>2</b> ) in CD <sub>3</sub> OD                | S15 |
| <sup>1</sup> H-NMR spectrum of of zorrimidazolone ( <b>2</b> ) in DMSO             | S16 |
| ROESY spectrum zorrimidazolone ( <b>2</b> ) in DMSO                                | S17 |
| ESI mass spectrum of compound <b>1</b> ( <b>3</b> )                                | S18 |
| ESI mass spectrum of zorrimidazolone ( <b>2</b> )                                  | S19 |

$^1\text{H-NMR}$  spectrum of compound **1** in  $\text{CDCl}_3$

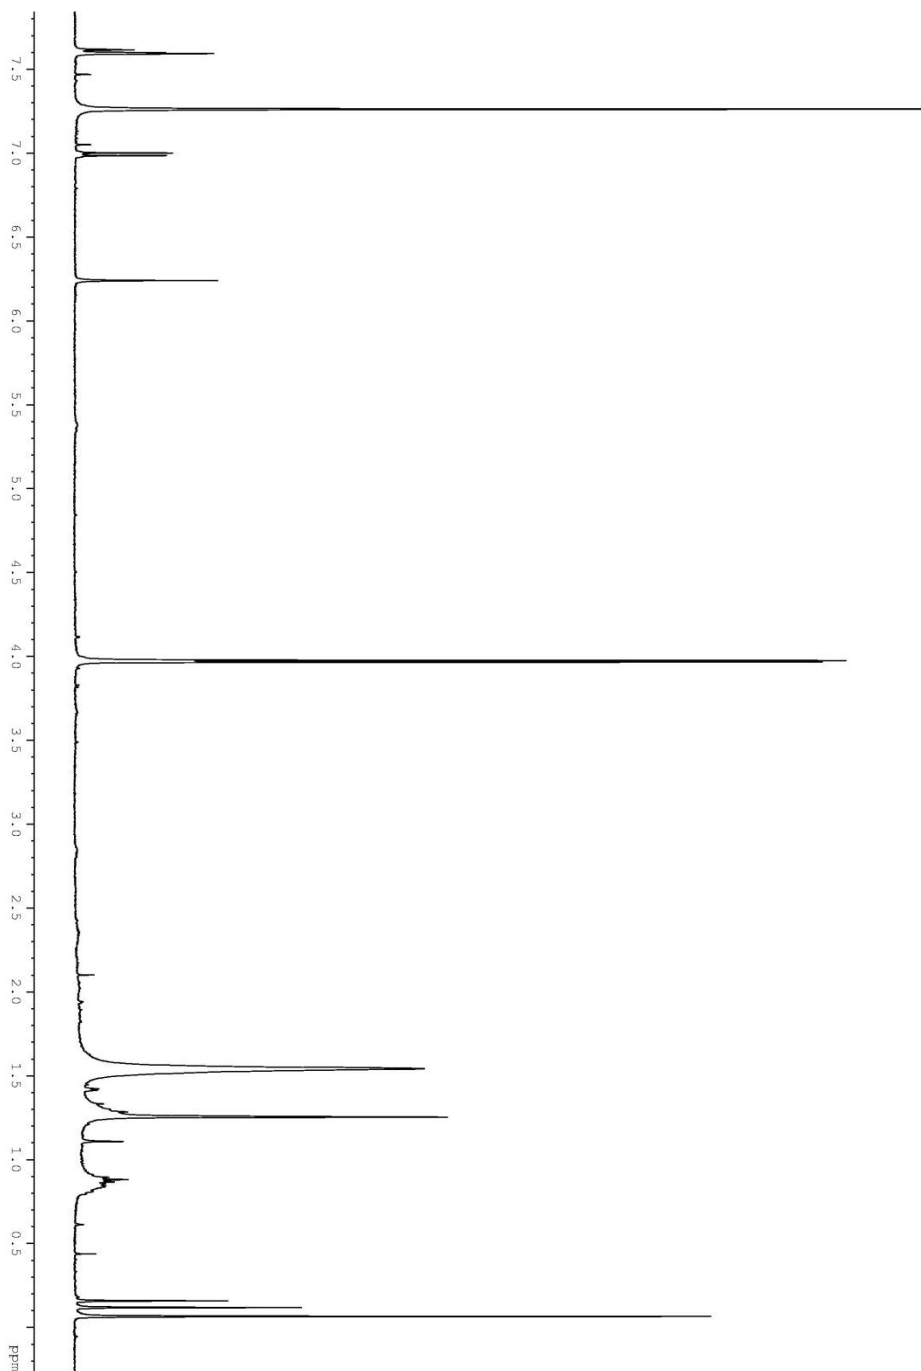

COSY spectrum of compound **1** in CDCl<sub>3</sub>

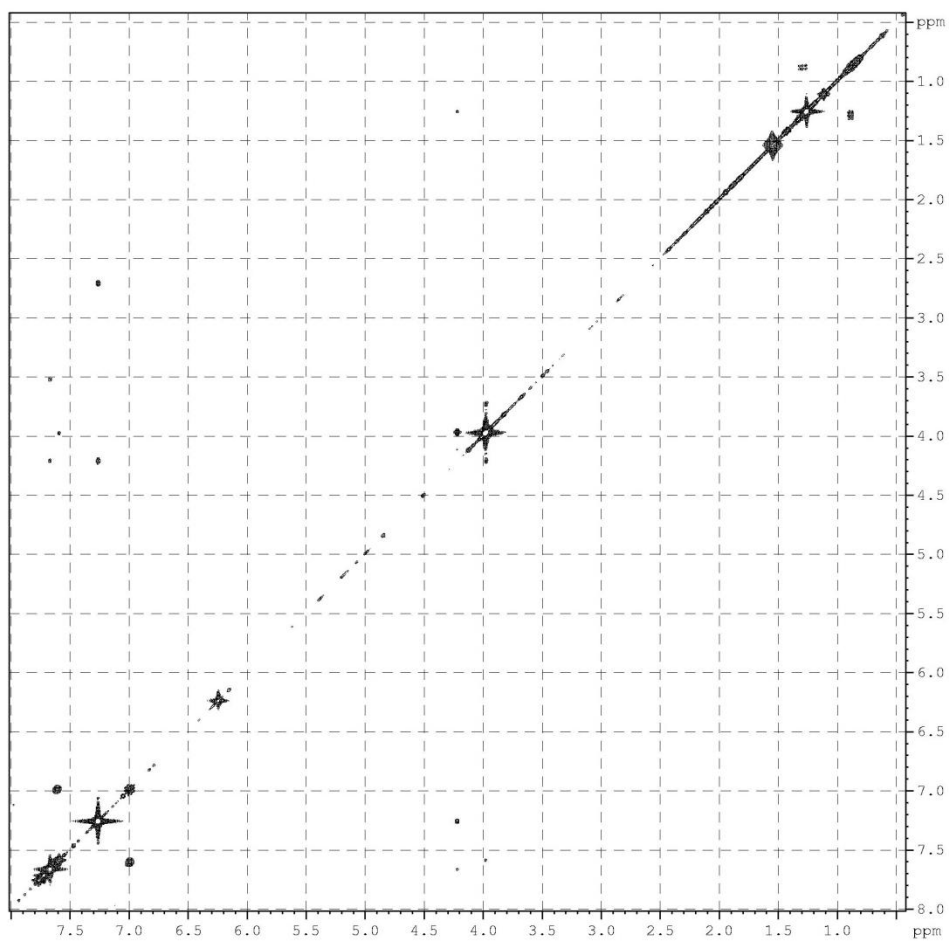

# HSQC spectrum of compound **1** in CDCl<sub>3</sub>

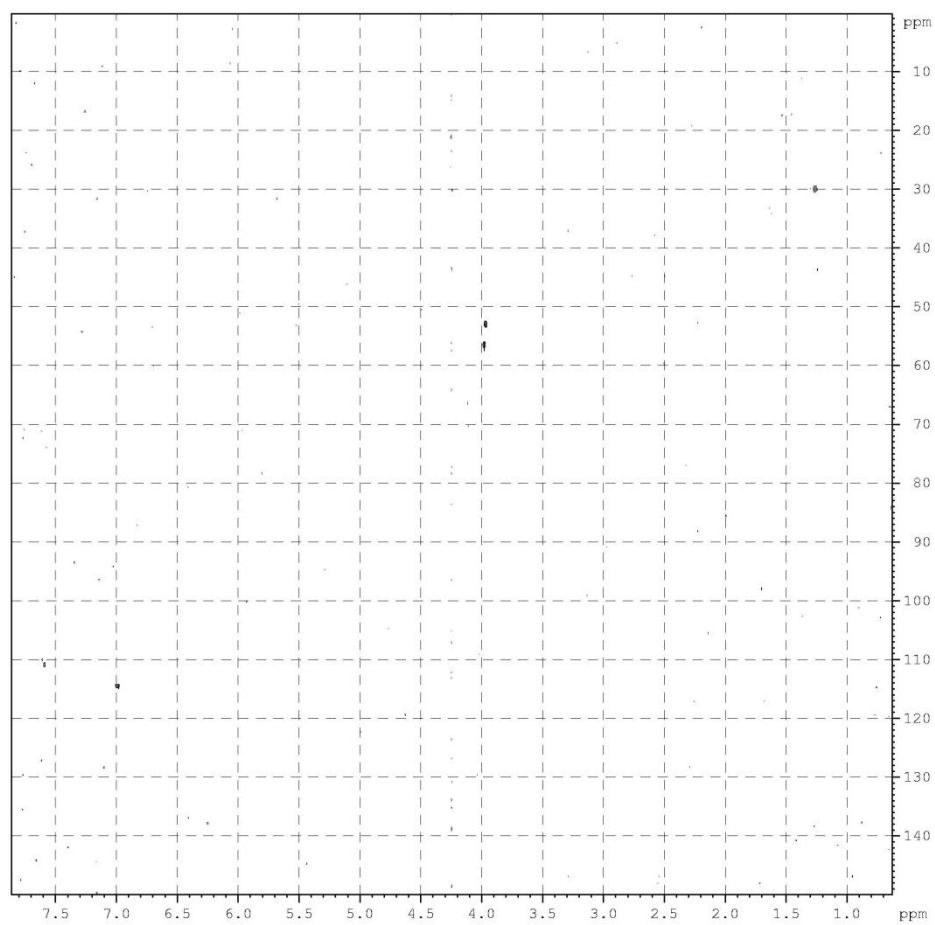

# HMBC spectrum of compound **1** in CDCl<sub>3</sub>

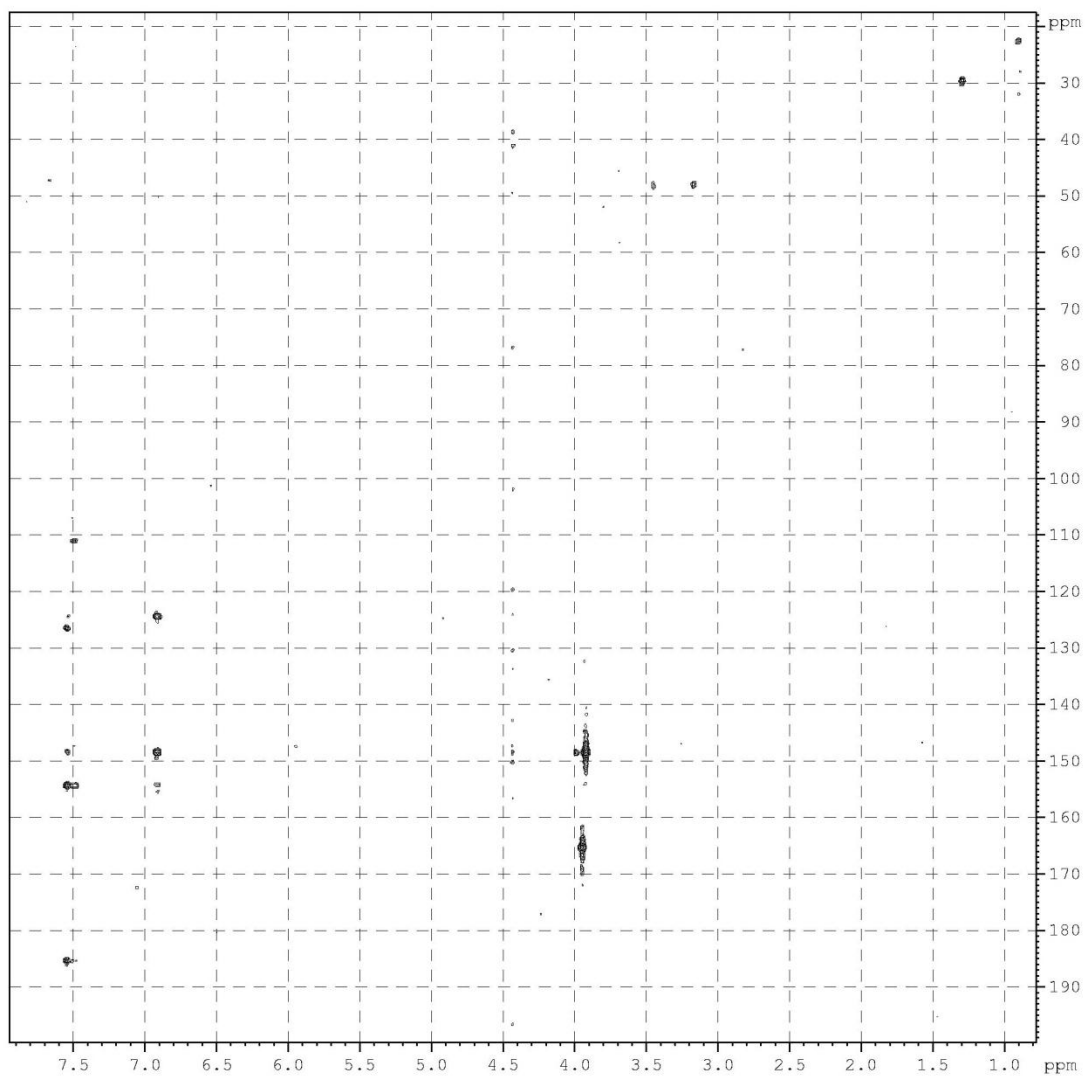

$^{13}\text{C}$ -NMR spectrum of compound **1** in  $\text{CDCl}_3$

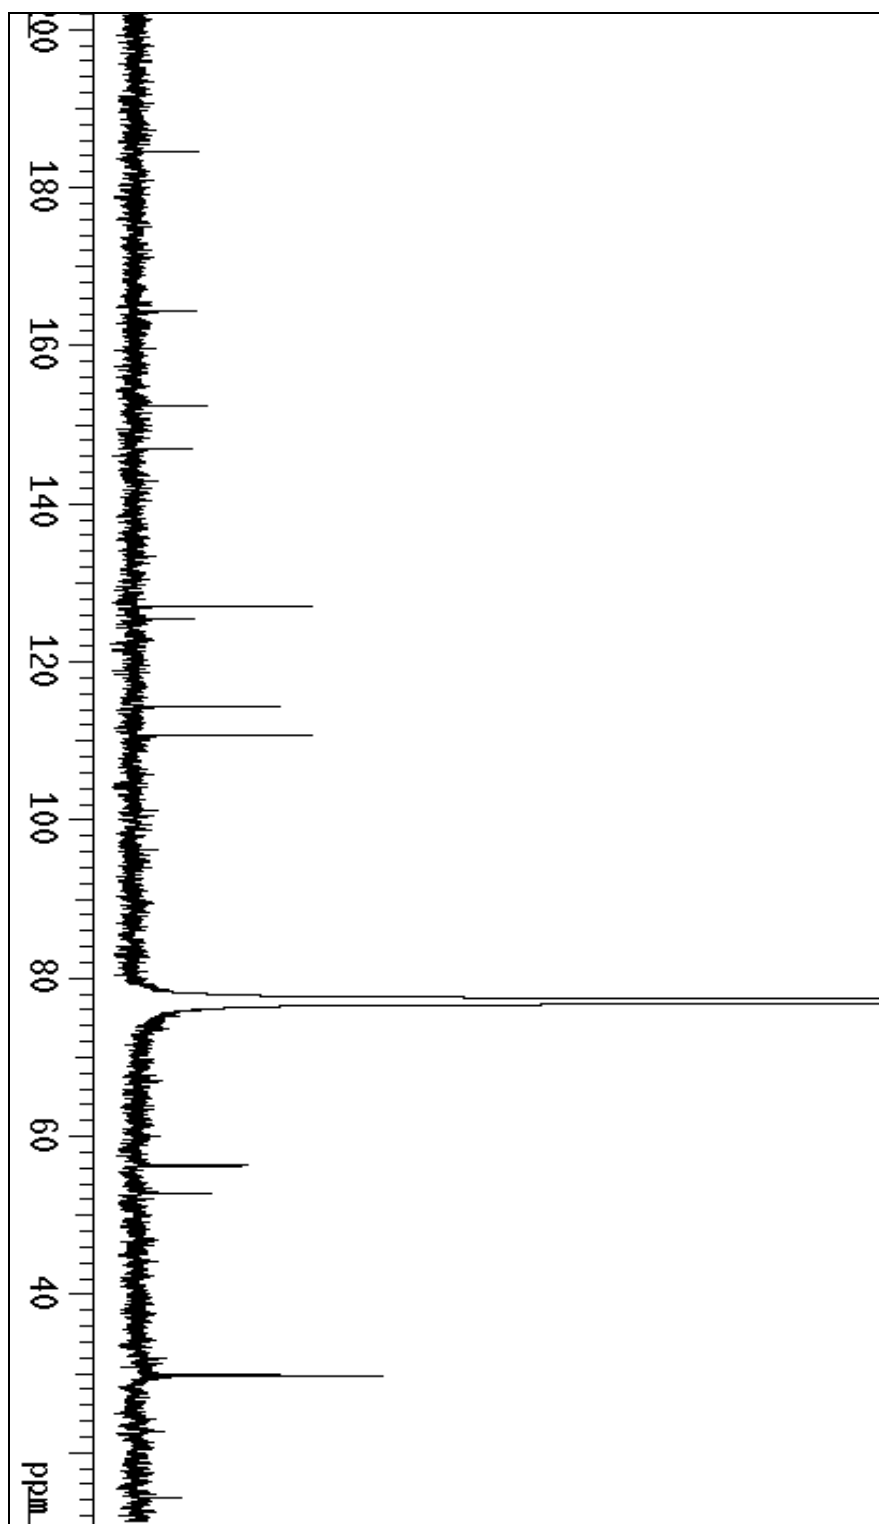

$^1\text{H}$ -NMR spectrum of compound **1** in DMSO

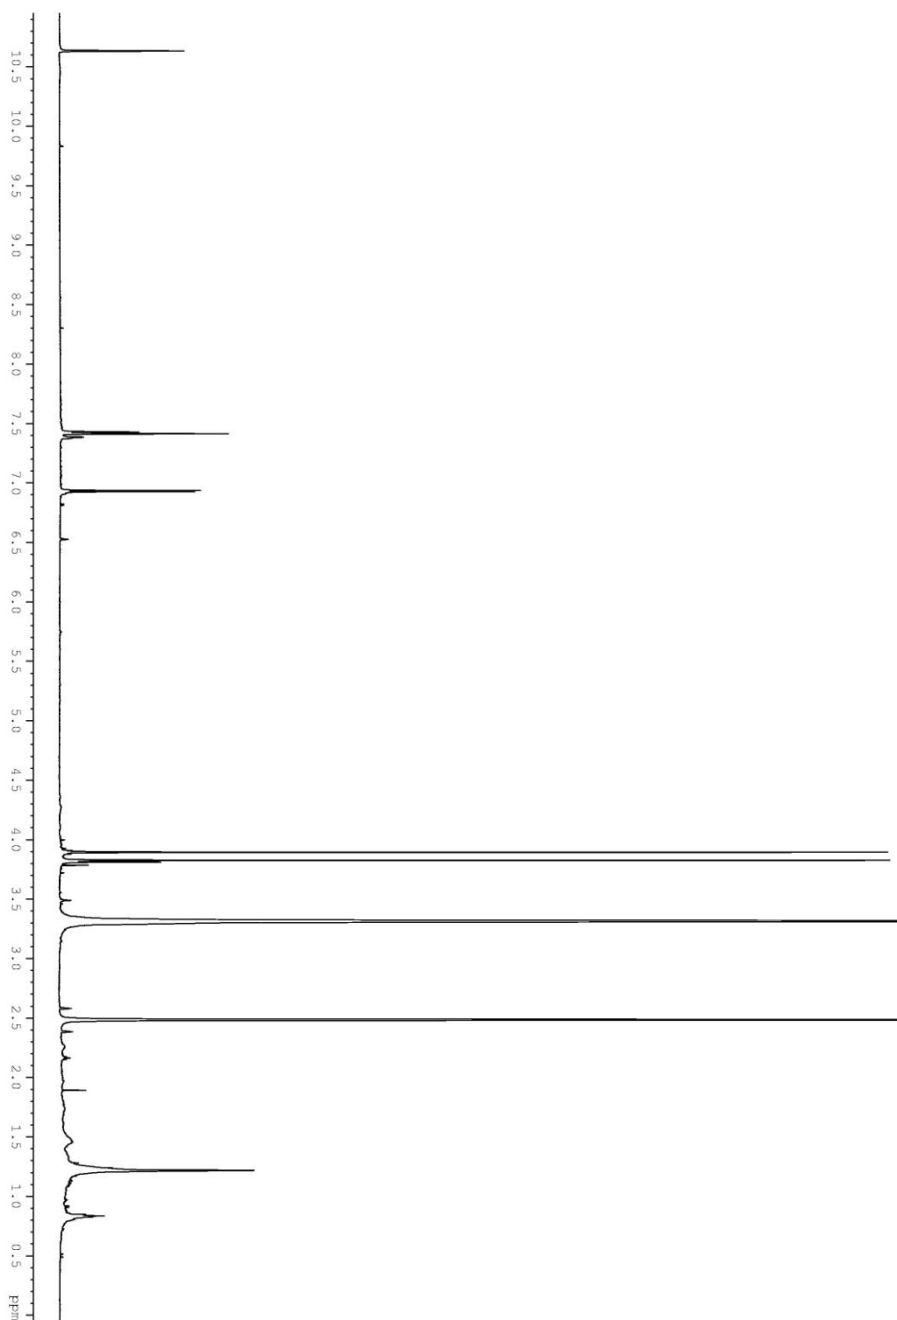

# COSY of compound 1 in DMSO

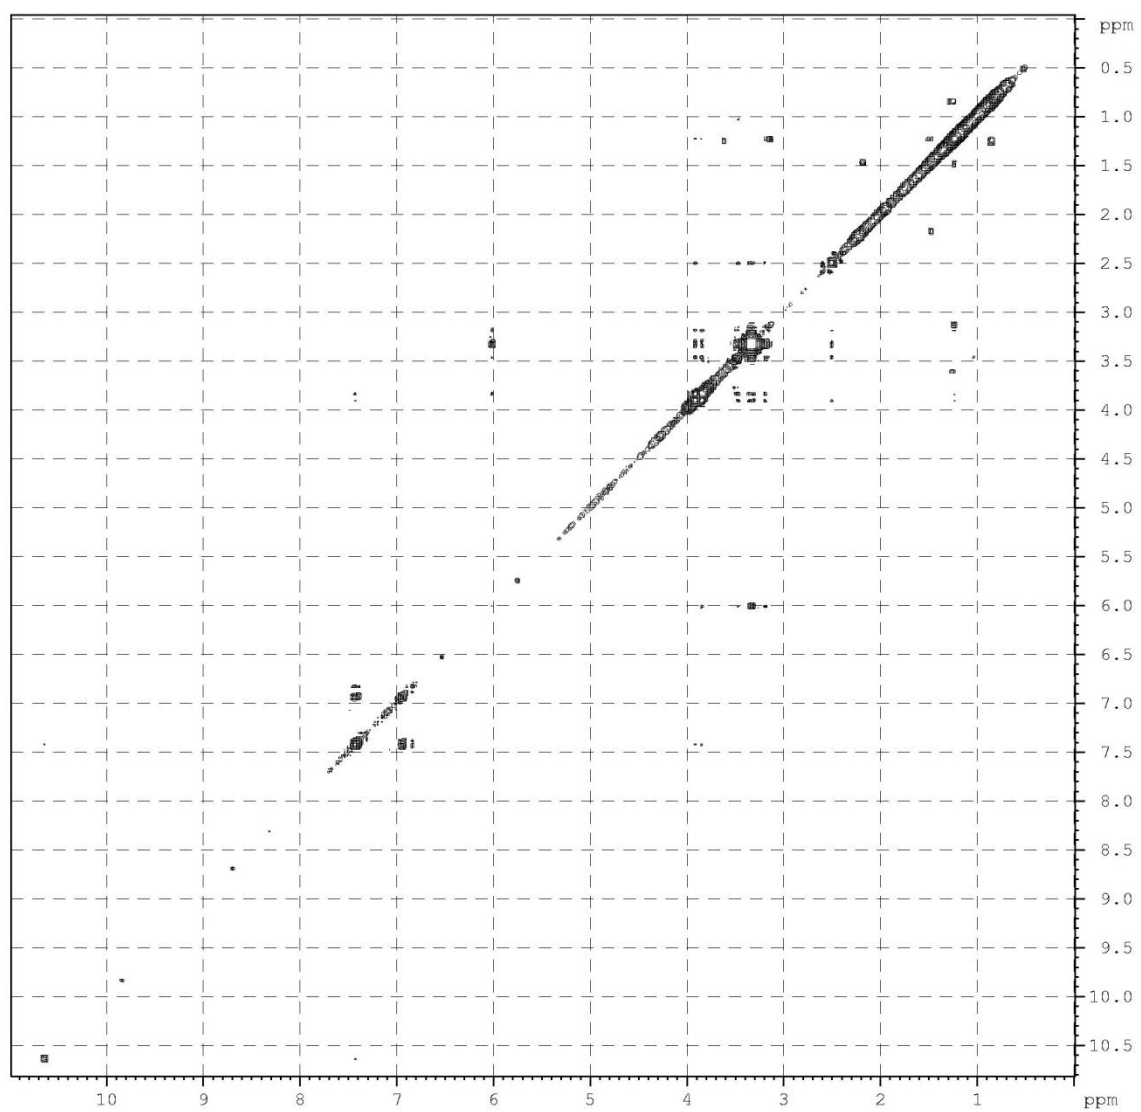



# HSQC of compound 1 in DMSO

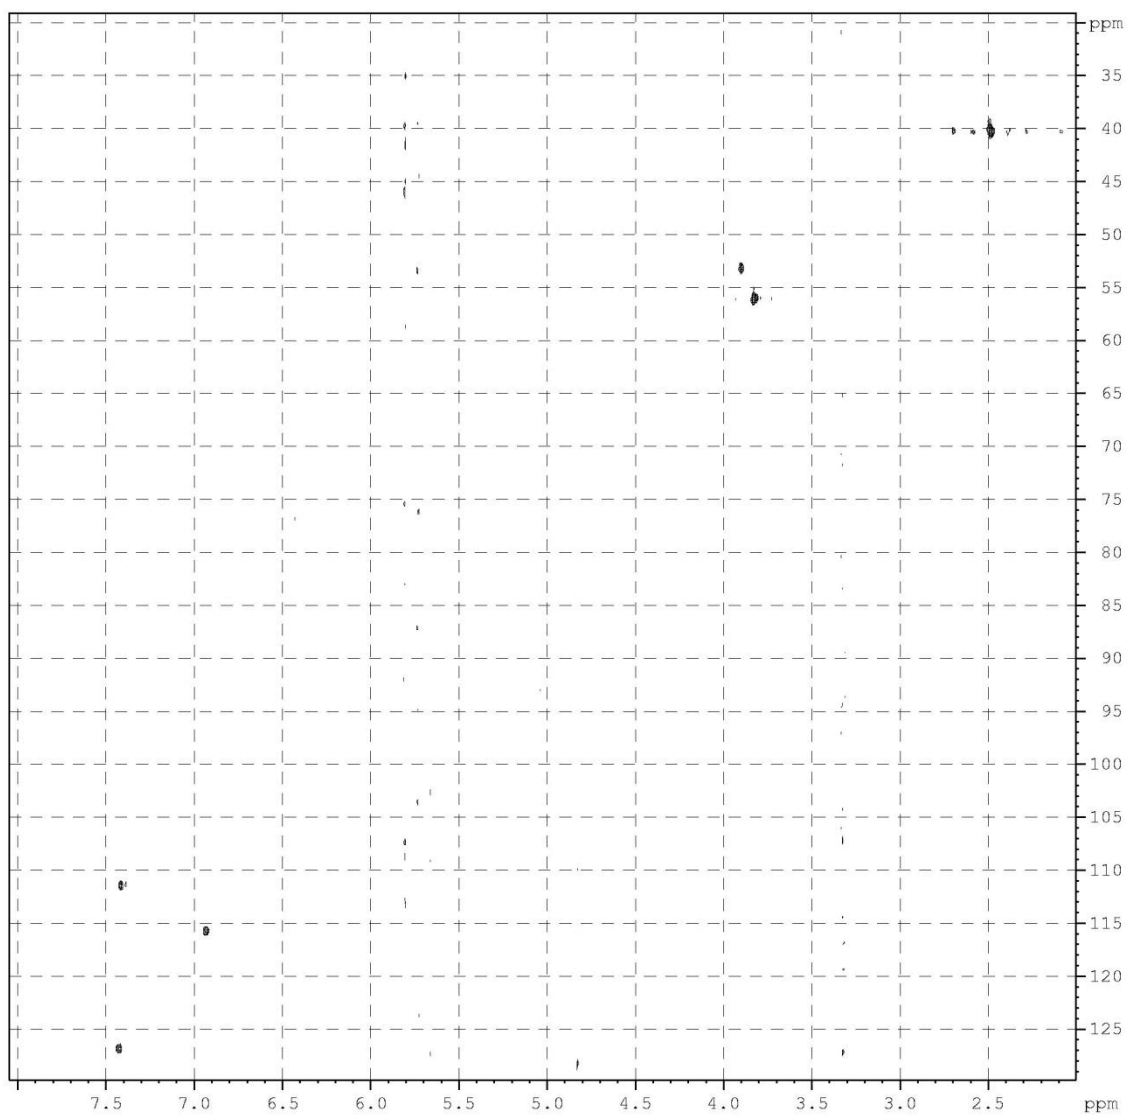

# HMBC of compound **1** in DMSO

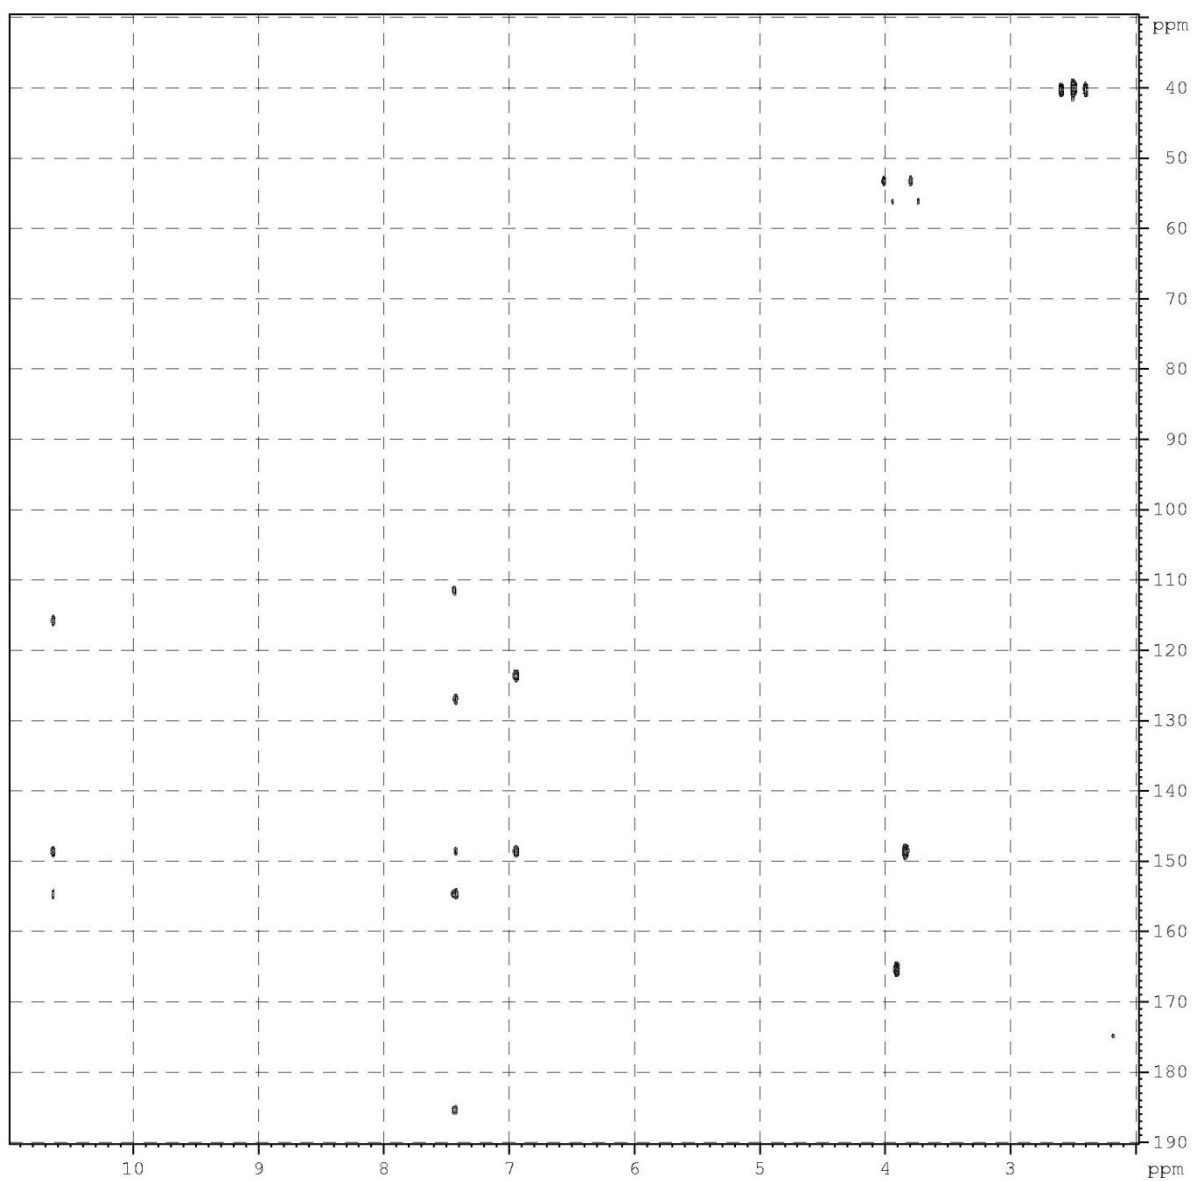

# ROESY of compound 1 in DMSO

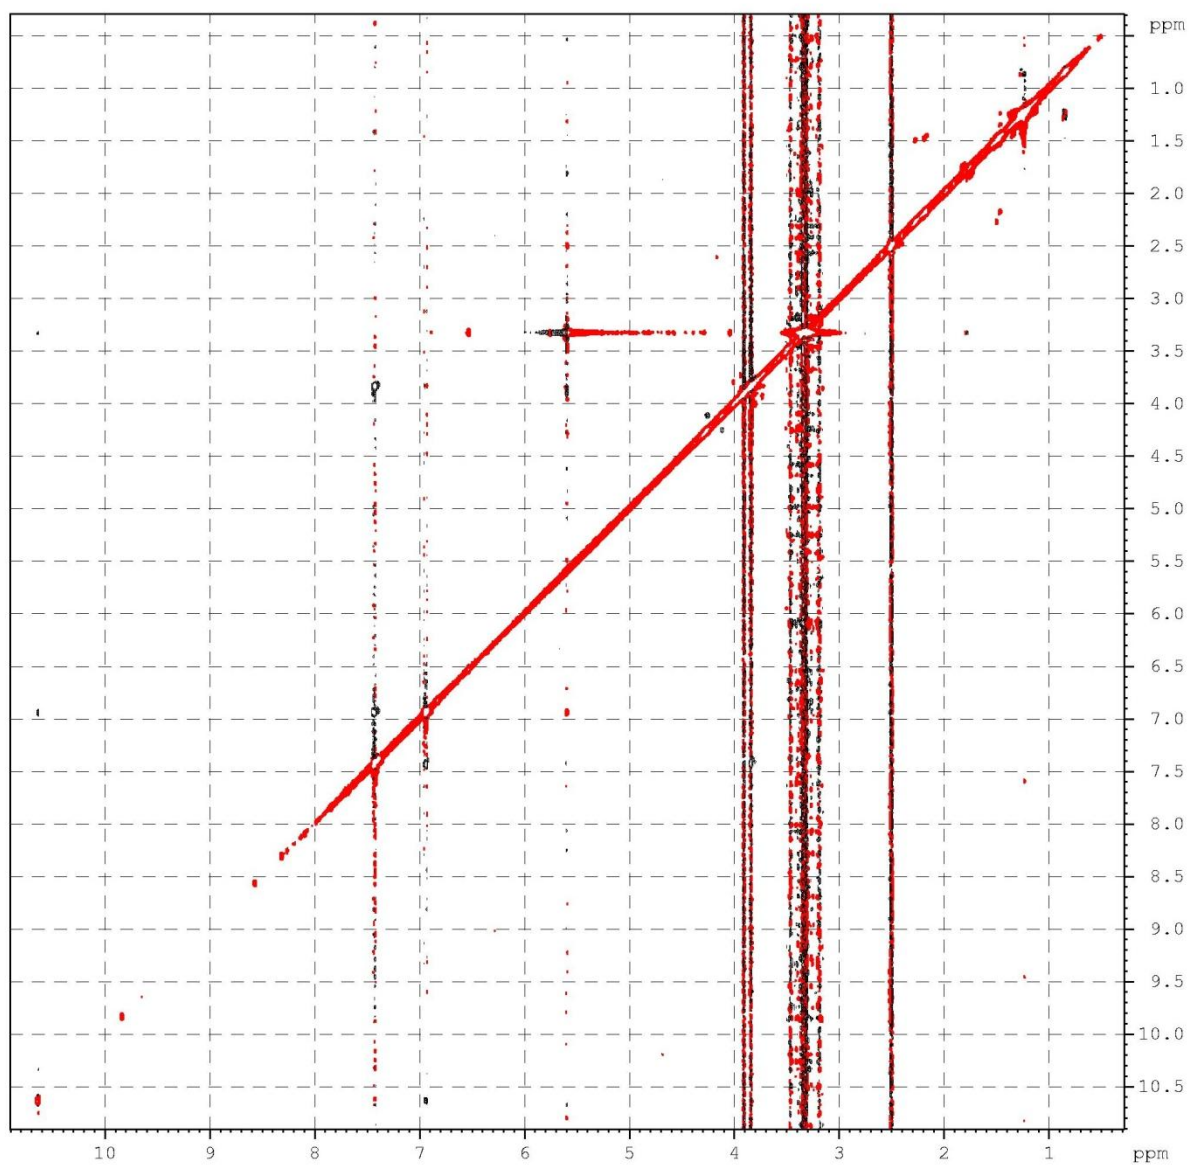

<sup>1</sup>H-NMR spectrum of zorrimidazolone (**2**) in CD<sub>3</sub>OD

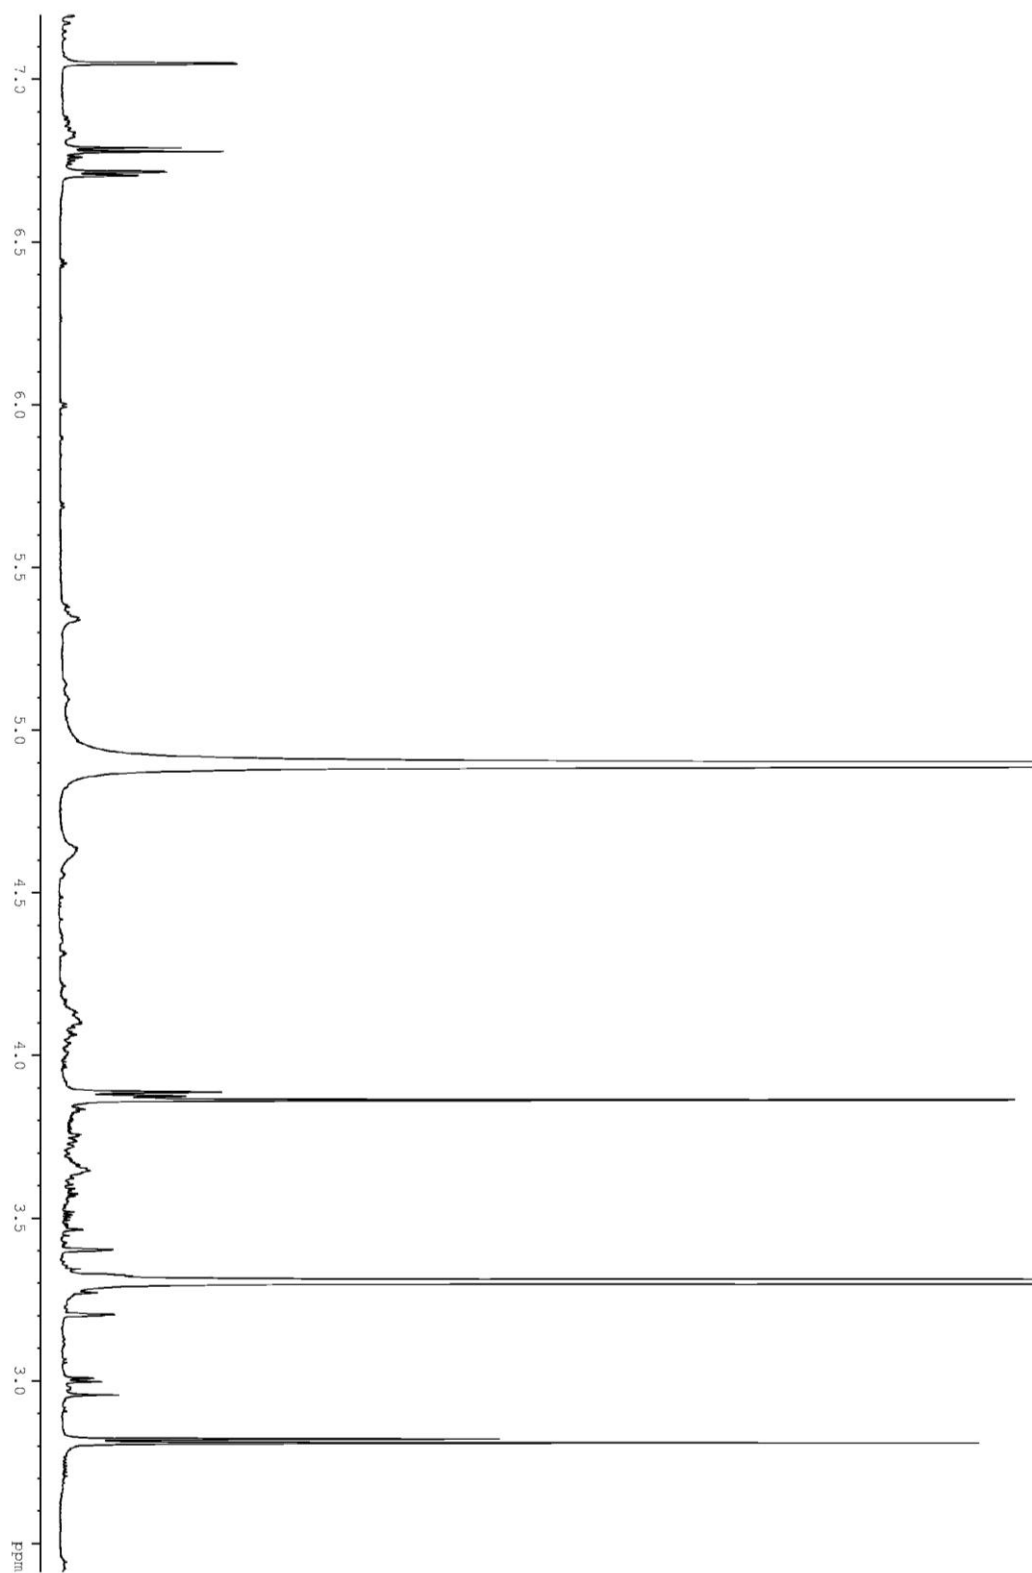

$^{13}\text{C}$ -NMR spectrum of zorrimidazolone (**2**) in  $\text{CD}_3\text{OD}$

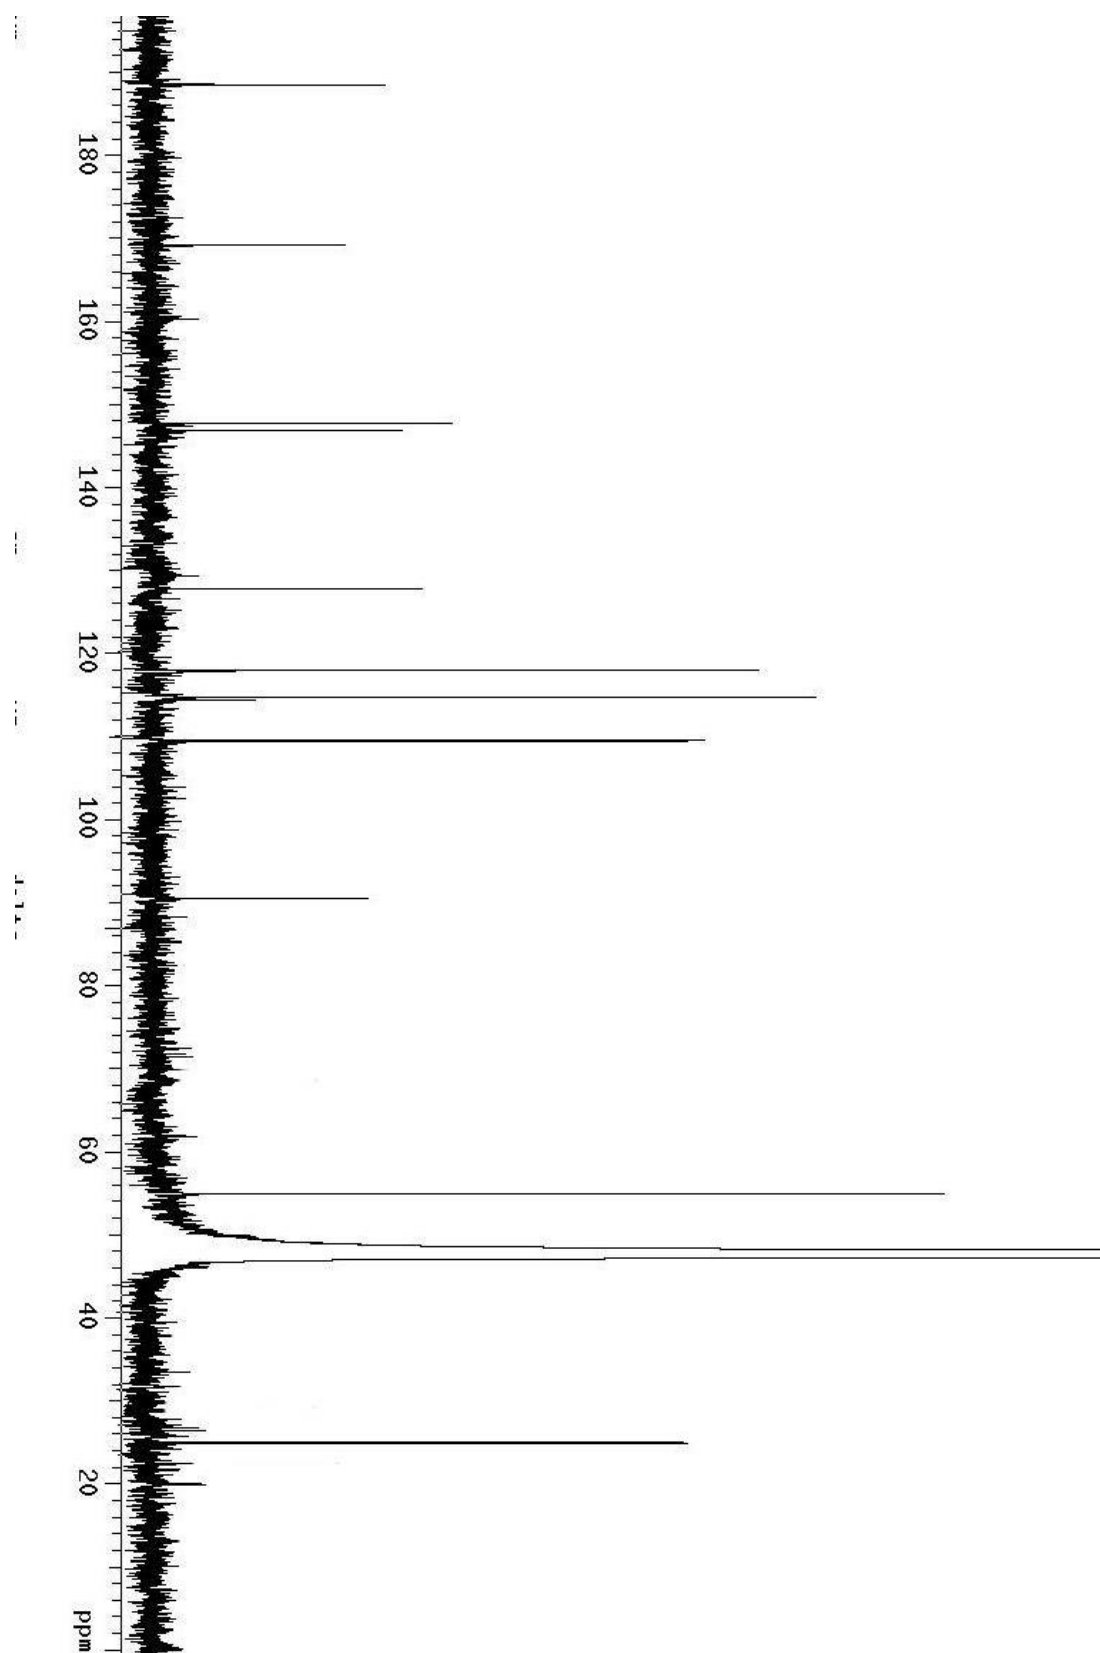



# HMBC spectrum of zorrimidazolone (2) in CD<sub>3</sub>OD

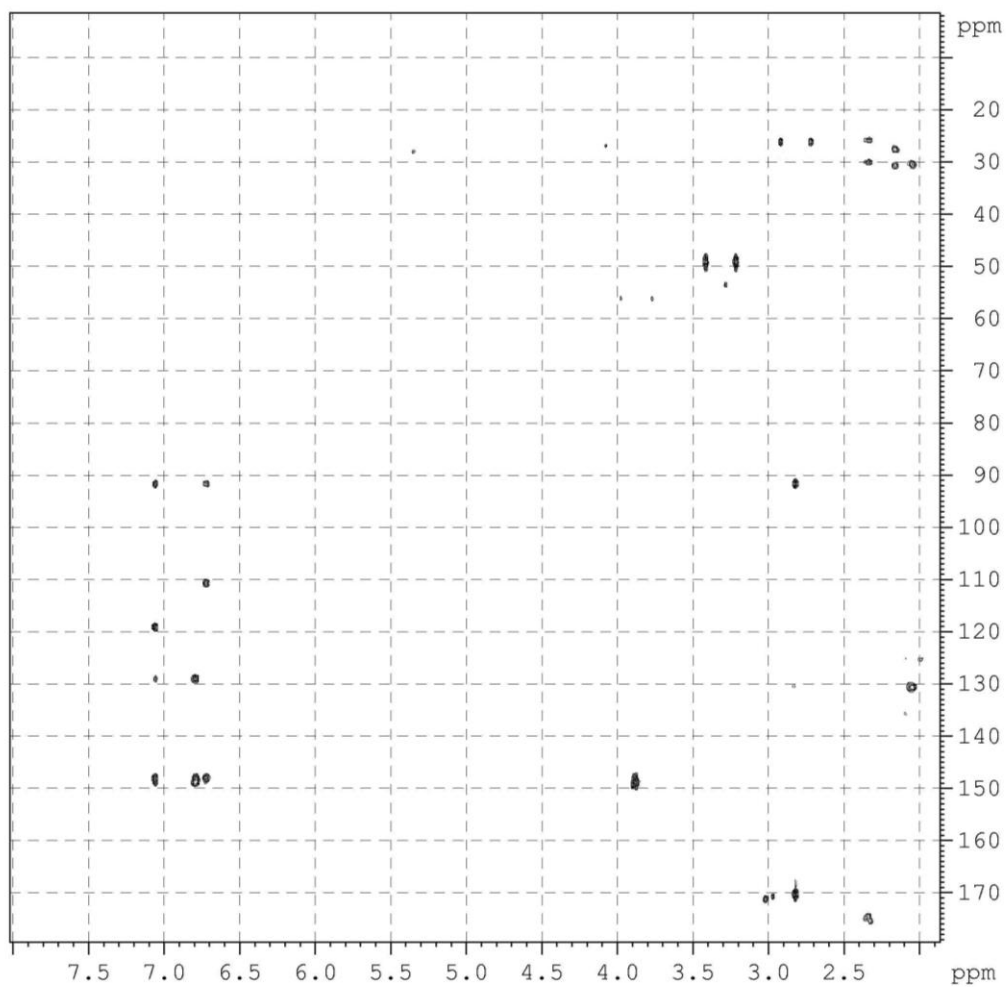

<sup>1</sup>H-NMR spectrum of zorrimidazolone (**2**) in DMSO

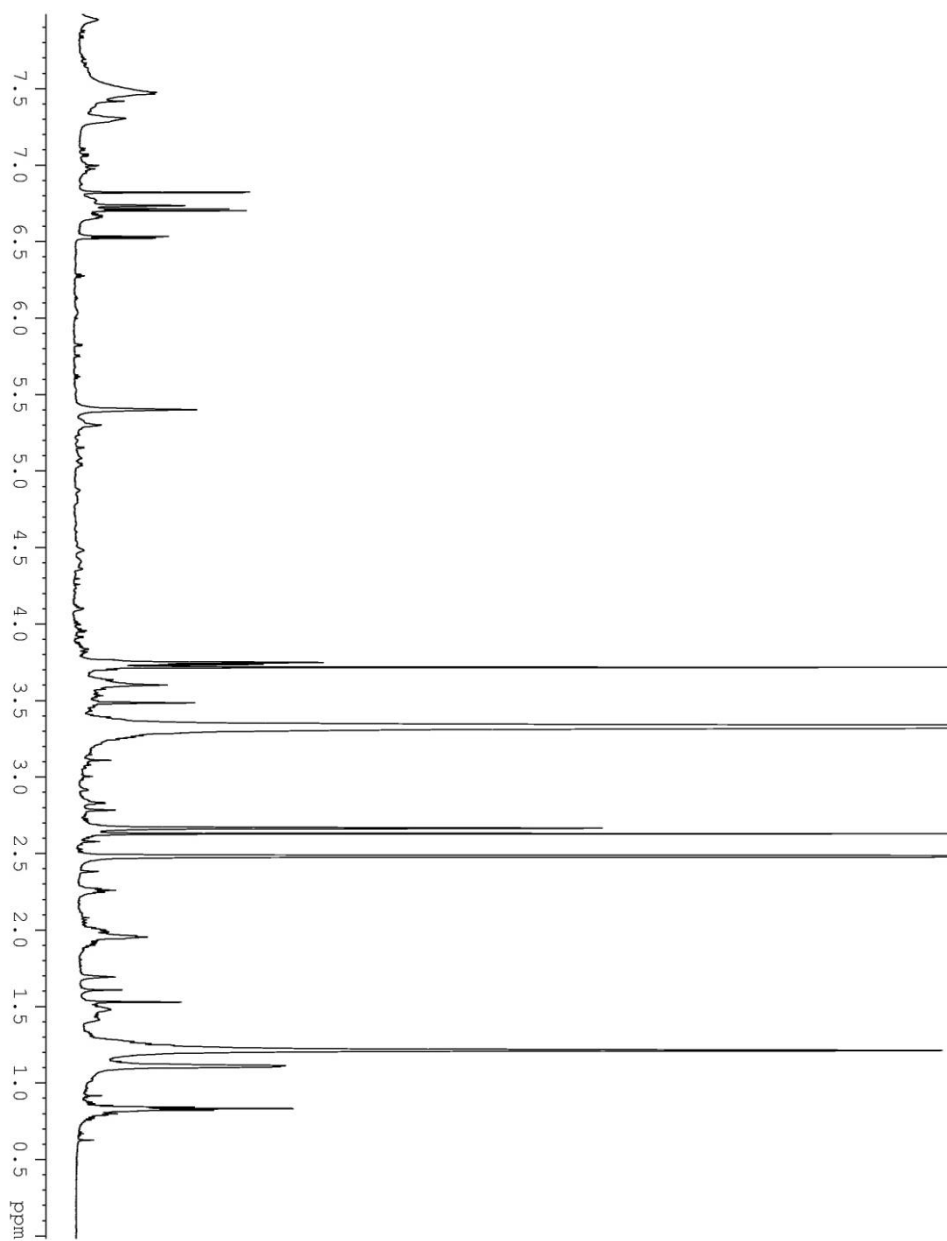



ROESY spectrum of zorrimidazolone (2) in DMSO

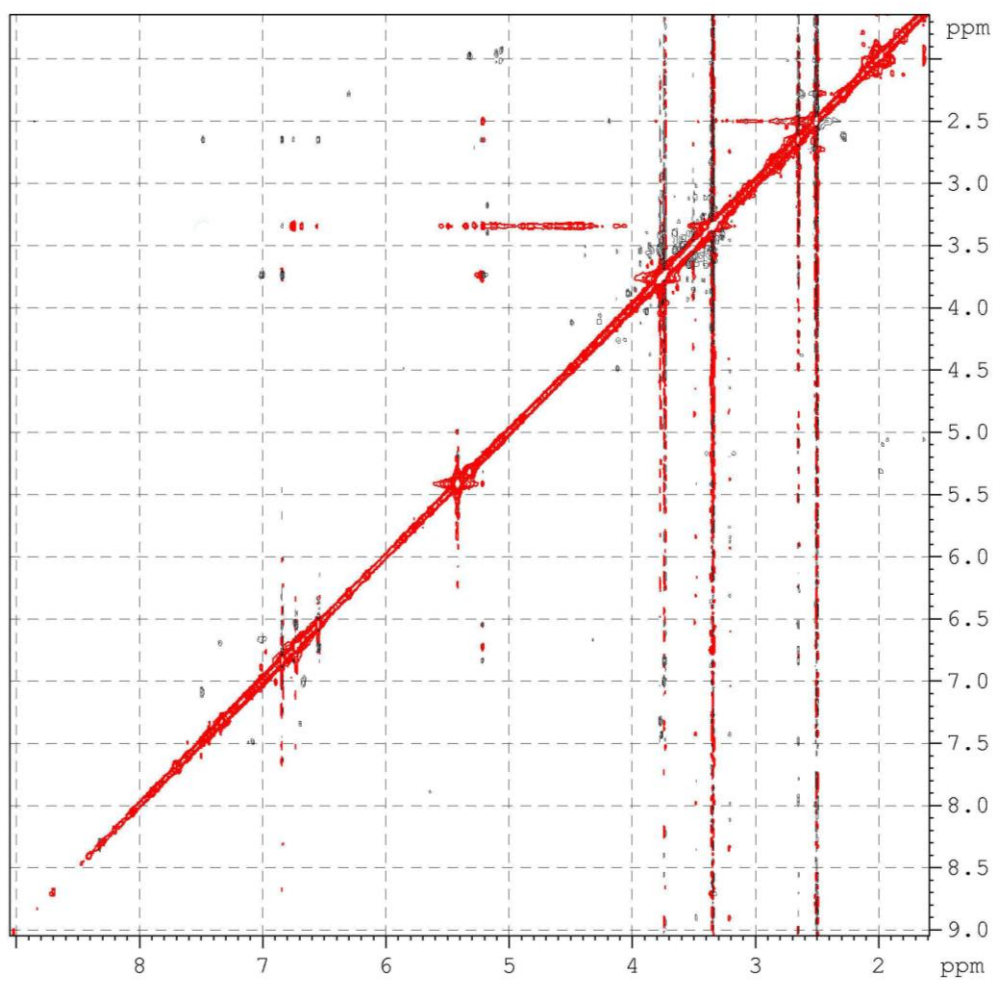

# ESI mass spectrum of compound 1

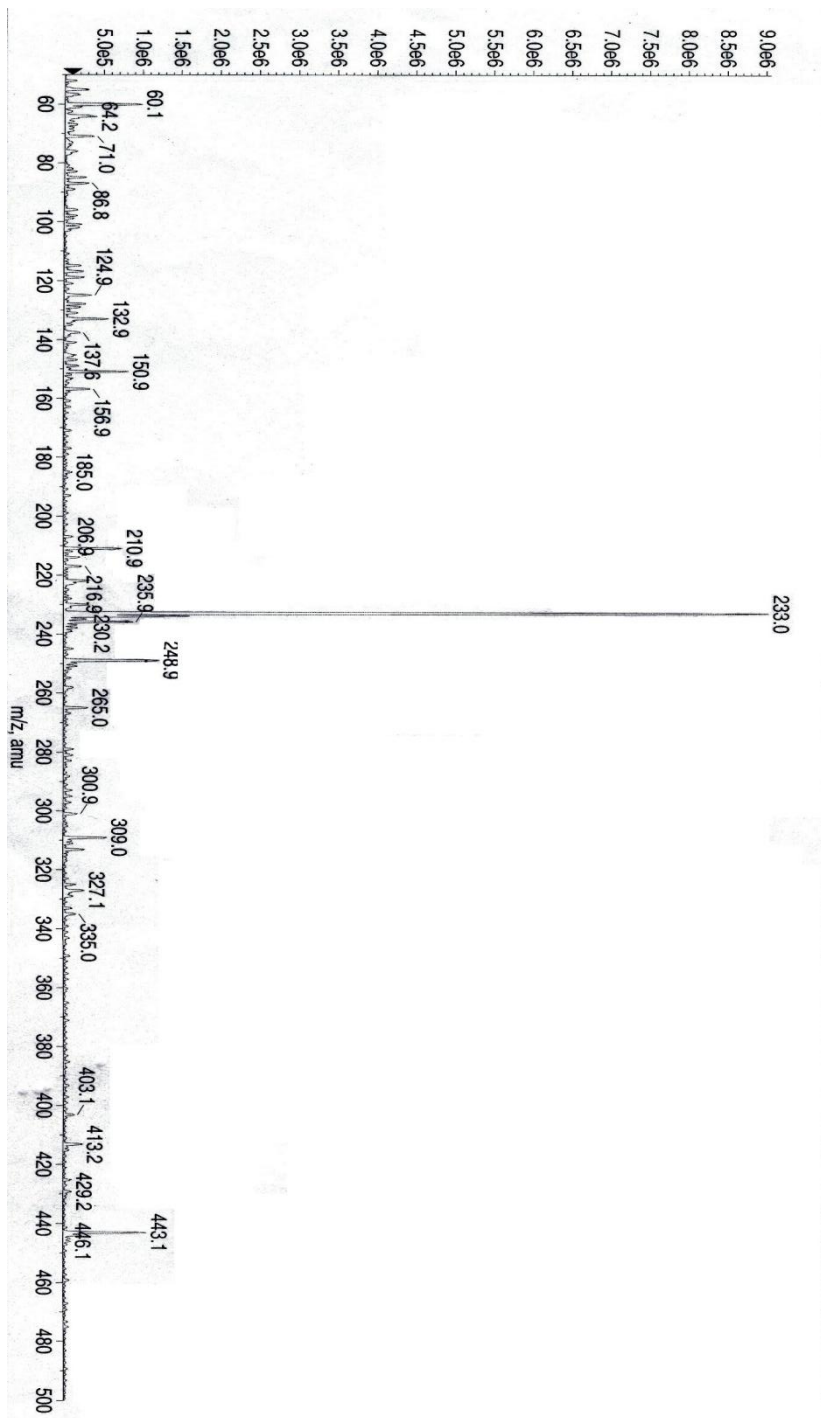

# ESI mass spectrum of zorrimidazolone (2)

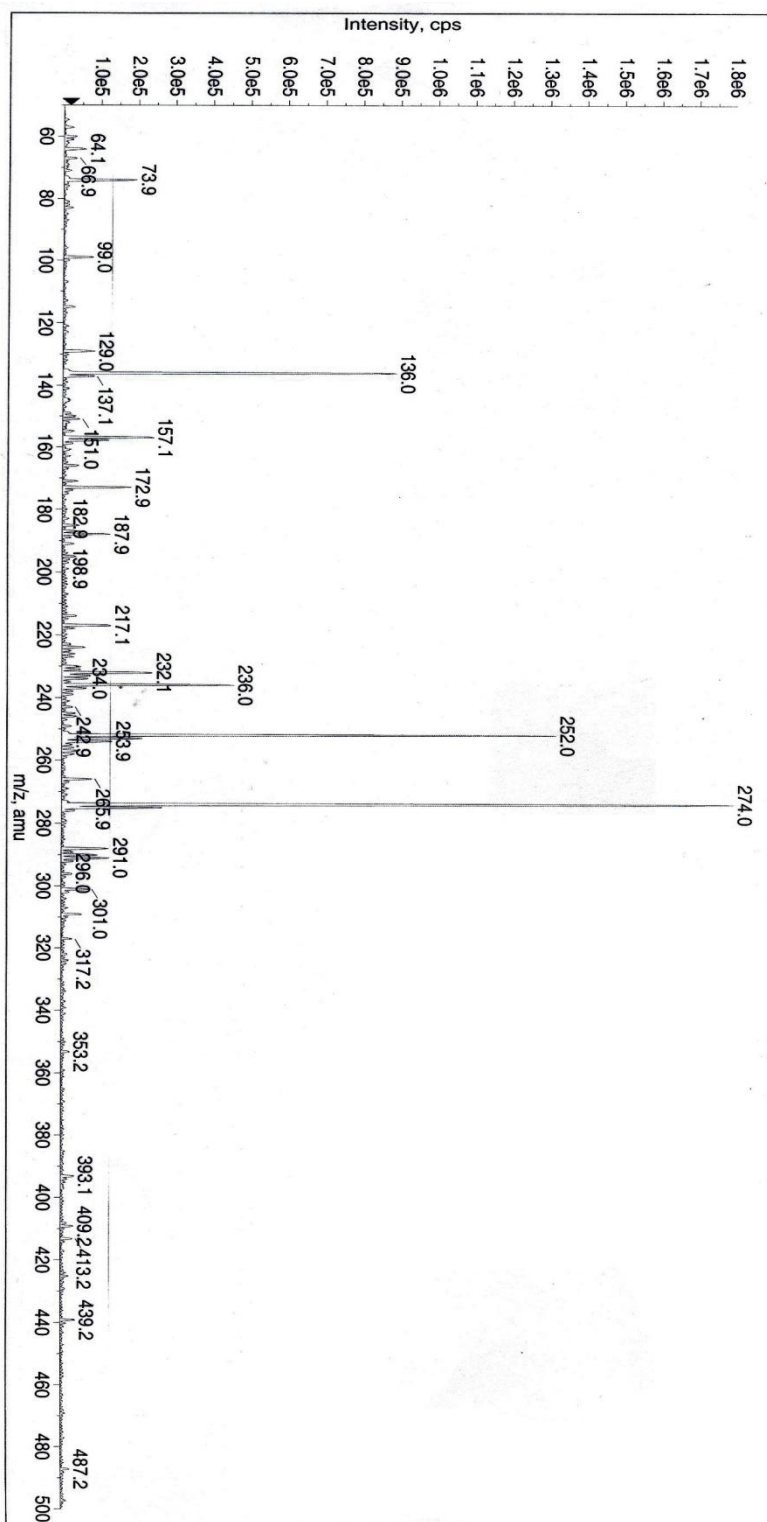

Supplement: s1 [file s1]
